# Supplementary material for: Soluble C-type lectin-like receptor 2 in stroke (CLECSTRO) study: protocol of a multicentre, prospective cohort of a novel platelet activation marker in acute ischaemic stroke and transient ischaemic attack
Source: HighWire-hosted journal article supplement (doi:10.1136/bmjopen-2023-073708), 2023-09-01
Supplement: bmjopen-2023-073708supp001_data_supplement.pdf [file bmjopen-2023-073708supp001_data_supplement.pdf]

Table. Study organization

|                                    |                                                                                                                                                                                                                                                                                                                                                                                                                                                                                                                                                                                                                                                                                                                                                                                                                                                                                                                                                                                                                                                                               |
|------------------------------------|-------------------------------------------------------------------------------------------------------------------------------------------------------------------------------------------------------------------------------------------------------------------------------------------------------------------------------------------------------------------------------------------------------------------------------------------------------------------------------------------------------------------------------------------------------------------------------------------------------------------------------------------------------------------------------------------------------------------------------------------------------------------------------------------------------------------------------------------------------------------------------------------------------------------------------------------------------------------------------------------------------------------------------------------------------------------------------|
| Principle Investigator             | Katsue Suzuki-Inoue, Department of Clinical and Laboratory Medicine, Faculty of Medicine, University of Yamanashi, Chuo, Japan                                                                                                                                                                                                                                                                                                                                                                                                                                                                                                                                                                                                                                                                                                                                                                                                                                                                                                                                                |
| Study Chair                        | Shinichiro Uchiyama, Clinical Research Center for Medicine, International University of Health and Welfare, Center for Brain and Cerebral Vessels, Sanno Medical Center, Tokyo, Japan                                                                                                                                                                                                                                                                                                                                                                                                                                                                                                                                                                                                                                                                                                                                                                                                                                                                                         |
| Head of Institution                | <ol style="list-style-type: none"> <li>1. Ryo Itabashi, Division of Neurology and Gerontology, Department of Internal Medicine, Iwate Medical School, Yahaba, Japan</li> <li>2. Haruhiko Hoshino, Department of Neurology, Tokyo Saiseikai Central Hospital, Tokyo, Japan</li> <li>3. Teruyuki Hirano, Department of Stroke and Cerebrovascular Medicine, Kyorin University, Mitaka, Japan</li> <li>4. Yutaka Honma, Department of Neurology, Showa General Hospital, Kodaira, Tokyo</li> <li>5. Takehiko Nagao, Department of Neurology, Nippon Medical School Musahikosugi Hospital, Kawasaki, Japan</li> <li>6. Hiroyuki Kinouchi, Department of Neurosurgery, Faculty of Medicine, University of Yamanashi, Chuo, Japan</li> <li>7. Nobuo Ito, Department of Neurology, Mie Prefectural General Medical Center, Yokkaichi, Japan</li> <li>8. Hiroshi Sugimori, Department of Cerebrovascular Medicine and Neurology, National Hospital Organization Kyushu Medical Center, Fukuoka, Japan</li> <li>9. Ayako Nishimura, LSI Medience Corporation, Katori, Japan</li> </ol> |
| Protocol and Publication Committee | 1. Shinichiro Uchiyama, Clinical Research Center for Medicine, International University of Health and Welfare, Center for Brain and Cerebral Vessels, Sanno Medical Center, Tokyo, Japan                                                                                                                                                                                                                                                                                                                                                                                                                                                                                                                                                                                                                                                                                                                                                                                                                                                                                      |

|  |                                                                                                                                                                                                                                                                                                                                                                                                                                                                                                                                                                                                                                                                                                         |
|--|---------------------------------------------------------------------------------------------------------------------------------------------------------------------------------------------------------------------------------------------------------------------------------------------------------------------------------------------------------------------------------------------------------------------------------------------------------------------------------------------------------------------------------------------------------------------------------------------------------------------------------------------------------------------------------------------------------|
|  | <ol style="list-style-type: none"><li>2. Katsue Suzuki-Inoue, Department of Clinical and Laboratory Medicine, Faculty of Medicine, University of Yamanashi, Chuo, Japan</li><li>3. Hideo Wada, Department of General and Laboratory Medicine, Mie Prefectural General Medical Center, Yokkaichi, Japan</li><li>4. Yasushi Okada, Department of Cerebrovascular Medicine and Neurology, National Hospital Organization Kyushu Medical Center, Fukuoka, Japan</li><li>5. Teruyuki Hirano, Department of Stroke and Cerebrovascular Medicine, Kyorin University, Mitaka, Japan</li><li>6. Takehiko Nagao, Department of Neurology, Nippon Medical School Musashikosugi Hospital, Kawasaki, Japan</li></ol> |
|--|---------------------------------------------------------------------------------------------------------------------------------------------------------------------------------------------------------------------------------------------------------------------------------------------------------------------------------------------------------------------------------------------------------------------------------------------------------------------------------------------------------------------------------------------------------------------------------------------------------------------------------------------------------------------------------------------------------|
